# Supplementary material for: Efficient Transfer of the Medium Frequency Magnetic Field Using Anisotropic Metamaterials
Source: MDPI journal article supplement (doi:10.3390/en16010334), 2022-12-28
Supplement: s1 [file s1]

# Tables with the exemplary optimized capacitances

Adam Steckiewicz <sup>1,\*</sup>

<sup>1</sup> Department of Electrical Engineering, Power Electronics and Power Engineering, Faculty of Electrical Engineering, Białystok University of Technology, Wiejska 45D Str., 15-351 Białystok, Poland; a.steckiewicz@pb.edu.pl (A.S.)

\* Correspondence: a.steckiewicz@pb.edu.pl

## 1. Introduction

The tables shown below contain some exemplary values of capacitances, which were the results (outputs) from the Nelder-Mead optimization procedure. These values were optimized, that is, found by the algorithm during the maximization of a function  $\eta = f(C)$ , for each pair of parameters (fill factor of a coil  $\nu$  and relative permeability  $\mu_m$ ) characterizing a metamaterial, at two frequencies of the magnetic field (25 kHz and 100 kHz).

## 2. Exemplary capacitances for a lower frequency magnetic meta-hose

Table S1. Optimized capacitances in (nF) resulting from the Nelder-Mead algorithm used for the design of a magnetic meta-hose, intended to operate in the external magnetic field at  $f_r = 25$  kHz

| Fill factor<br>$\nu$ (-) | Relative permeability of the composite material<br>$\mu_m$ (-) |          |          |          |          |          |          |
|--------------------------|----------------------------------------------------------------|----------|----------|----------|----------|----------|----------|
|                          | 1                                                              | 25       | 50       | 75       | 100      | 125      | 150      |
| 0.15                     | 10.436 nF                                                      | 4.474 nF | 2.707 nF | 1.870 nF | 1.429 nF | 1.155 nF | 0.972 nF |
| 0.30                     | 5.444 nF                                                       | 2.302 nF | 1.333 nF | 0.933 nF | 0.717 nF | 0.582 nF | 0.486 nF |
| 0.45                     | 3.110 nF                                                       | 1.577 nF | 0.930 nF | 0.657 nF | 0.505 nF | 0.410 nF | 0.346 nF |
| 0.60                     | 2.406 nF                                                       | 1.235 nF | 0.734 nF | 0.518 nF | 0.400 nF | 0.325 nF | 0.274 nF |
| 0.75                     | 2.046 nF                                                       | 0.983 nF | 0.624 nF | 0.441 nF | 0.341 nF | 0.281 nF | 0.234 nF |

### 3. Exemplary capacitances for a higher frequency magnetic meta-hose

Table S2. Optimized capacitances in (nF) resulting from the Nelder-Mead algorithm used for the design of a magnetic meta-hose, intended to operate in the external magnetic field at  $f_r = 100$  kHz

| Fill factor<br>$\nu$ (-) | Relative permeability of the composite material<br>$\mu_m$ (-) |          |          |          |          |          |          |
|--------------------------|----------------------------------------------------------------|----------|----------|----------|----------|----------|----------|
|                          | 1                                                              | 25       | 50       | 75       | 100      | 125      | 150      |
| 0.15                     | 0.702 nF                                                       | 0.302 nF | 0.169 nF | 0.117 nF | 0.089 nF | 0.072 nF | 0.058 nF |
| 0.30                     | 0.293 nF                                                       | 0.143 nF | 0.083 nF | 0.058 nF | 0.043 nF | 0.036 nF | 0.031 nF |
| 0.45                     | 0.191 nF                                                       | 0.098 nF | 0.058 nF | 0.041 nF | 0.032 nF | 0.026 nF | 0.022 nF |
| 0.60                     | 0.147 nF                                                       | 0.077 nF | 0.046 nF | 0.032 nF | 0.025 nF | 0.020 nF | 0.017 nF |
| 0.75                     | 0.125 nF                                                       | 0.065 nF | 0.039 nF | 0.028 nF | 0.021 nF | 0.017 nF | 0.015 nF |
